# Supplementary material
Source: PubMed Central journal article supplement (PMC8906398)
Supplement: jvi.01769-21-s0001.pdf [file jvi.01769-21-s0001.pdf]

**Table S1 Strains and plasmids used in this study.**

| Strain/plasmid                                    | Description                                                                              | Source              |
|---------------------------------------------------|------------------------------------------------------------------------------------------|---------------------|
| <b>Strain</b>                                     |                                                                                          |                     |
| <i>P. aeruginosa</i> PAO1                         | Wild type                                                                                | ATCC 15692          |
| Pa $\Delta$ <i>pilB</i>                           | Mutant of <i>P. aeruginosa</i> PAO1 in which <i>pilB</i> was deleted                     | This study          |
| PAO1-pBBR5                                        | Expression of the empty vector pBBR5 in <i>P. a. eruginosa</i> PAO1                      | This study          |
| Pa $\Delta$ <i>pilB</i> -pBBR5                    | Expression of the empty vector pBBR5 in Pa $\Delta$ <i>pilB</i>                          | This study          |
| PAO1-gp21                                         | Expression of gp21 gene in <i>P. aeruginosa</i> PAO1                                     | This study          |
| <i>E. coli</i> BL21(DE3)                          | Cloning strain                                                                           | Novagen             |
| <i>E. coli</i> S17-1                              | RP4 derivative integrated in chromosome                                                  | Teng <sup>a</sup>   |
| <i>E. coli</i> DH5 $\alpha$                       | Cloning strain                                                                           | Novagen             |
| <b>Plasmid</b>                                    |                                                                                          |                     |
| pBBR1MCS5                                         | Km <sup>r</sup> , mob+, pBBR1 replicon, cloning vector                                   | Kovach <sup>b</sup> |
| pBBR-gp21                                         | pBBR1MCS5 containing gp21 from phage vB Pae QDWS 211102                                  | Our lab             |
| pK18mobsacBtet                                    | Km <sup>r</sup> and Tet <sup>r</sup> , <i>sacB</i> , RP4 oriT, ColE1 ori; suicide vector | This study          |
| pK18mobsacB <sub>tet</sub> - $\Delta$ <i>pilB</i> | Km <sup>r</sup> and Tet <sup>r</sup> , sucrose sensitive, <i>pilB</i> -disrupted vector  | This study          |

<sup>a</sup> Teng F, Murray BE, Weinstock GM. 1998. Conjugal transfer of plasmid DNA from *Escherichia coli* to enterococci: a method to make insertion mutations. *Plasmid* 39:182–186. doi:10.1006/plas.1998.1336.

<sup>b</sup> Kovach ME, Elzer PH, Hill DS, Robertson GT, Farris MA, Roop RM 2nd, Peterson KM. 1995. Four new derivatives of the broad-host-range cloning vector pBBR1MCS, carrying different antibiotic-resistance cassettes. *Gene*. 166:175-176.

**Table S2 Primers used in this study.**

| Primers        | Sequence (5'-3')                                   | Usage                                            |
|----------------|----------------------------------------------------|--------------------------------------------------|
| pilB-delete-1  | GCTATGACATGATTACGAATTGCCTCACCCCTCTGA<br>ACGAA      | Flanking up region<br>for <i>pilB</i> disruption |
| pilB-delete-2  | CCAGGCTGGTCACCAGCGACAGCTTGTT                       |                                                  |
| pilB-delete-3  | GTCGCTGGTGACCAGCCTGGAGGAAGTC                       | Flanking down<br>region for <i>pilB</i>          |
| pilB-delete-4  | CCCGGGTACCGAGCTCGAATTGGAGAAGTTGAG<br>CTGCATGC      | disruption                                       |
| pilB-test-1    | CGCCTGAACCTCAACAAGCA                               | <i>pilB</i> disruption<br>identified             |
| pilB-test-2    | GTCGAACGATTGCAGGAGG                                |                                                  |
| gp21-1         | CACAGGAAACAGCTATGACCATGAAGATTGCGAA<br>AGTCCCATAACC | Construction of                                  |
| gp21-2         | GACTCACTATAGGGCGAATTCATACTTTGACTCC<br>TACCTGTCTG   | pBBR5-gp21                                       |
| pBBR5 -1       | AATTGCGCCCTATAGTGAGTCG                             |                                                  |
| pBBR5 -2       | GGTCATAGCTGTTTCCTGTGTG                             |                                                  |
| qPCR-rplS-1    | ATACCGTGATCGTCCAGGTC                               |                                                  |
| qPCR- rplS- 2  | GGCTGTAGGTCTGGAAGGTA                               |                                                  |
| qPCR-lasI-1    | AAGTTGCGTGCTCAAGTGTT                               |                                                  |
| qPCR-lasI-2    | ATCGAGAATTCGCCAGCAAC                               |                                                  |
| qPCR-rhII-1    | TATTCTGGTCCAGCCTGCAA                               |                                                  |
| qPCR-rhII-2    | GTCTCGCCCTTGACCTTCT                                |                                                  |
| qPCR-pqsR-1    | AAGATCTCCCCTTCAACCA                                |                                                  |
| qPCR- pqsR-2   | CTGATCTGCCGGTAATTGGC                               |                                                  |
| qPCR-fimU-1    | TTCACCCTGATCGAGTTGCT                               |                                                  |
| qPCR- fimU-2   | TGCTTGAAGTTCGGAATGGC                               |                                                  |
| qPCR-pilV-1    | CAGGGCAAGACCATCCAGTA                               |                                                  |
| qPCR- pilV-2   | TGGCCTGAAGAAGTCGGAT                                | Primers for RT-<br>qPCR                          |
| qPCR- pilW-1   | GTGGAAGCTTCGTGCAACA                                |                                                  |
| qPCR- pilW-2   | GATCCAATCGTCCAGGGTCT                               |                                                  |
| qPCR- pilX -1  | CCGAATACGGCAACCTGATG                               |                                                  |
| qPCR- pilX-2   | GTTTCGCTGTTGGTCTGGTT                               |                                                  |
| qPCR- pilY1 -1 | TCGAGCTTCAGGGTGTCTTT                               |                                                  |
| qPCR- pilY1-2  | GATCACGATGTAGCCCTTGC                               |                                                  |
| qPCR- pilA -1  | CTGTTGAAGAGTCGCTGTCTG                              |                                                  |
| qPCR- pilA-2   | ACACCCAACTTGTGGCATC                                |                                                  |
| qPCR- pilB-1   | GACAAGTCCACCCAAGAGGA                               |                                                  |
| qPCR- pilB-2   | CTTCTCGTAGGGCTCGAAGT                               |                                                  |
| qPCR- pilE -1  | CAAGACAGAAGGGCTTCACG                               |                                                  |
| qPCR- pilE-2   | TTGGAGCGGATCACGTAGTT                               |                                                  |
